# Supplementary material for: NDRG1 overexpression promotes the progression of esophageal squamous cell carcinoma through modulating Wnt signaling pathway
Source: PubMed Central journal article supplement — Cancer Biol Ther. 2016 Jul 14;17(9):943–54. doi: 10.1080/15384047.2016.1210734 (PMC5036407; doi:10.1080/15384047.2016.1210734), 2016-07-14
Supplement: kcbt-17-09-1210734-s001.pdf [file kcbt-17-09-1210734-s001.pdf]

# **NDRG1 overexpression promotes the progression of esophageal squamous cell carcinoma through modulating Wnt signaling pathway**

Runna Ai<sup>a</sup>, Yulin Sun<sup>a</sup>, Zhimin Guo<sup>a</sup>, Wei Wei<sup>b</sup>, Lanping Zhou<sup>a</sup>, Fang Liu<sup>a</sup>, Denver T. Hendricks<sup>b</sup>, Yang Xu<sup>a,\*</sup>, Xiaohang Zhao<sup>a,\*</sup>

## **Author affiliations:**

<sup>a</sup>State Key Laboratory of Molecular Oncology, Cancer Hospital, Chinese Academy of Medical Sciences and Peking Union Medical College, Beijing, China

<sup>b</sup>Division of Medical Biochemistry, Institute of Infectious Disease and Molecular Medicine, Faculty of Health Sciences, University of Cape Town, Cape Town, South Africa

## **Supporting Information**

**Supplementary Table 1.** The expression change of NDRG1 from KYSE30- Ctrl and KYSE30-NDRG1 cells in Human Cancer Pathway Finder PCR array (PAHS-033A).

**Supplementary Table 2.** The expression change of NDRG1 from KYSE30- Ctrl and KYSE30-NDRG1 cells in Epithelial Mesenchymal Transition PCR array (PAHS-090A).

**Supplementary Table 3.** The expression change of NDRG1 from KYSE30- Ctrl and KYSE30-NDRG1 cells in Wnt Signaling Pathway PCR array (PAHS-043A).

**Supplementary Table 4.** Description of primers selected for validation by Real-Time RT-PCR

**Supplementary Table 1.** The expression change of NDRG1 from KYSE30- Ctrl and KYSE30-NDRG1 cells in Human Cancer Pathway Finder PCR array (PAHS-033A).

| Symbol   | Description                                                                            | Fold change<br>(NDRG1 vs Ctrl) |
|----------|----------------------------------------------------------------------------------------|--------------------------------|
| MMP1     | Matrix metalloproteinase 1 (interstitial collagenase)                                  | 6.43                           |
| MTSS1    | Metastasis suppressor 1                                                                | 3.18                           |
| TNFRSF25 | Tumor necrosis factor receptor superfamily, member 25                                  | 2.40                           |
| SYK      | Spleen tyrosine kinase                                                                 | 2.07                           |
| CDC25A   | Cell division cycle 25 homolog A (S. pombe)                                            | 1.83                           |
| PLAUR    | Plasminogen activator, urokinase receptor                                              | 1.83                           |
| TGFB1    | Transforming growth factor, beta 1                                                     | 1.80                           |
| SERPINB5 | Serpin peptidase inhibitor, clade B (ovalbumin), member 5                              | 1.67                           |
| MYC      | V-mycmyelocytomatosis viral oncogene homolog (avian)                                   | 1.64                           |
| MMP2     | Matrix metalloproteinase 2 (gelatinase A, 72kDa gelatinase, 72kDa type IV collagenase) | 1.61                           |
| ANGPT1   | Angiopoietin 1                                                                         | 1.57                           |
| CDK4     | Cyclin-dependent kinase 4                                                              | 1.48                           |
| THBS1    | Thrombospondin 1                                                                       | 1.31                           |
| MET      | Met proto-oncogene (hepatocyte growth factor receptor)                                 | 1.21                           |
| CCNE1    | Cyclin E1                                                                              | 1.20                           |
| E2F1     | E2F transcription factor 1                                                             | 1.19                           |
| GZMA     | Granzyme A (granzyme 1, cytotoxic T-lymphocyte-associated serine esterase 3)           | 1.15                           |
| CDK2     | Cyclin-dependent kinase 2                                                              | 1.13                           |
| RAF1     | V-raf-1 murine leukemia viral oncogene homolog 1                                       | 1.12                           |
| ACTB     | Actin, beta                                                                            | 1.06                           |
| TIMP1    | TIMP metalloproteinase inhibitor 1                                                     | 1.06                           |
| ITGB5    | Integrin, beta 5                                                                       | 1.04                           |
| GAPDH    | Glyceraldehyde-3-phosphate dehydrogenase                                               | 1.04                           |
| NME4     | Non-metastatic cells 4, protein expressed in                                           | 1.02                           |
| MTA2     | Metastasis associated 1 family, member 2                                               | 1.02                           |
| ITGB3    | Integrin, beta 3 (platelet glycoprotein IIIa, antigen CD61)                            | 1.01                           |
| B2M      | Beta-2-microglobulin                                                                   | 0.99                           |
| ANGPT2   | Angiopoietin 2                                                                         | 0.96                           |
| MAP2K1   | Mitogen-activated protein kinase kinase 1                                              | 0.96                           |
| NFKB1    | Nuclear factor of kappa light polypeptide gene enhancer in B-cells 1                   | 0.95                           |

|          |                                                                                               |      |
|----------|-----------------------------------------------------------------------------------------------|------|
| SERPINE1 | Serpin peptidase inhibitor, clade E (nexin, plasminogen activator inhibitor type 1), member 1 | 0.95 |
| NME1     | Non-metastatic cells 1, protein (NM23A) expressed in                                          | 0.95 |
| HPRT1    | Hypoxanthine phosphoribosyltransferase 1                                                      | 0.95 |
| JUN      | Jun proto-oncogene                                                                            | 0.94 |
| EPDR1    | Ependymin related protein 1 (zebrafish)                                                       | 0.94 |
| BAX      | BCL2-associated X protein                                                                     | 0.91 |
| BCL2     | B-cell CLL/lymphoma 2                                                                         | 0.87 |
| TEK      | TEK tyrosine kinase, endothelial                                                              | 0.86 |
| BCL2L1   | BCL2-like 1                                                                                   | 0.85 |
| IFNA1    | Interferon, alpha 1                                                                           | 0.85 |
| CDKN1A   | Cyclin-dependent kinase inhibitor 1A (p21, Cip1)                                              | 0.85 |
| TP53     | Tumor protein p53                                                                             | 0.84 |
| ITGB1    | Integrin, beta 1 (fibronectin receptor, beta polypeptide, antigen CD29 includes MDF2, MSK12)  | 0.83 |
| BAD      | BCL2-associated agonist of cell death                                                         | 0.83 |
| TWIST1   | Twist homolog 1 (Drosophila)                                                                  | 0.82 |
| PNN      | Pinin, desmosome associated protein                                                           | 0.81 |
| IFNB1    | Interferon, beta 1, fibroblast                                                                | 0.80 |
| PDGFB    | Platelet-derived growth factor beta polypeptide                                               | 0.79 |
| CFLAR    | CASP8 and FADD-like apoptosis regulator                                                       | 0.79 |
| PIK3R1   | Phosphoinositide-3-kinase, regulatory subunit 1 (alpha)                                       | 0.79 |
| CASP8    | Caspase 8, apoptosis-related cysteine peptidase                                               | 0.77 |
| MCAM     | Melanoma cell adhesion molecule                                                               | 0.76 |
| CHEK2    | CHK2 checkpoint homolog (S. pombe)                                                            | 0.76 |
| PDGFA    | Platelet-derived growth factor alpha polypeptide                                              | 0.73 |
| TERT     | Telomerase reverse transcriptase                                                              | 0.72 |
| FOS      | FBJ murine osteosarcoma viral oncogene homolog                                                | 0.71 |
| TNF      | Tumor necrosis factor                                                                         | 0.71 |
| ETS2     | V-Etserythroblastosis virus E26 oncogene homolog 2 (avian)                                    | 0.71 |
| ITGA2    | Integrin, alpha 2 (CD49B, alpha 2 subunit of VLA-2 receptor)                                  | 0.71 |
| MDM2     | Mdm2 p53 binding protein homolog (mouse)                                                      | 0.69 |
| RB1      | Retinoblastoma 1                                                                              | 0.69 |
| TNFRSF1A | Tumor necrosis factor receptor superfamily, member 1A                                         | 0.68 |
| HTATIP2  | HIV-1 Tat interactive protein 2, 30kDa                                                        | 0.68 |
| ITGA3    | Integrin, alpha 3 (antigen CD49C, alpha 3 subunit of VLA-3 receptor)                          | 0.67 |
| COL18A1  | Collagen, type XVIII, alpha 1                                                                 | 0.65 |

|           |                                                                                                                |      |
|-----------|----------------------------------------------------------------------------------------------------------------|------|
| MTA1      | Metastasis associated 1                                                                                        | 0.64 |
| TNFRSF10B | Tumor necrosis factor receptor superfamily, member 10b                                                         | 0.64 |
| NFKBIA    | Nuclear factor of kappa light polypeptide gene enhancer in B-cells inhibitor, alpha                            | 0.62 |
| AKT1      | V-akt murine thymoma viral oncogene homolog 1                                                                  | 0.59 |
| TGFBR1    | Transforming growth factor, beta receptor 1                                                                    | 0.59 |
| APAF1     | Apoptotic peptidase activating factor 1                                                                        | 0.59 |
| RPL13A    | Ribosomal protein L13a                                                                                         | 0.58 |
| IGF1      | Insulin-like growth factor 1 (somatomedin C)                                                                   | 0.56 |
| ATM       | Ataxia telangiectasia mutated                                                                                  | 0.56 |
| PLAU      | Plasminogen activator, urokinase                                                                               | 0.55 |
| BRCA1     | Breast cancer 1, early onset                                                                                   | 0.54 |
| SNCG      | Synuclein, gamma (breast cancer-specific protein 1)                                                            | 0.54 |
| VEGFA     | Vascular endothelial growth factor A                                                                           | 0.53 |
| ITGA1     | Integrin, alpha 1                                                                                              | 0.52 |
| CDKN2A    | Cyclin-dependent kinase inhibitor 2A (melanoma, p16, inhibits CDK4)                                            | 0.50 |
| FGFR2     | Fibroblast growth factor receptor 2                                                                            | 0.48 |
| FAS       | Fas (TNF receptor superfamily, member 6)                                                                       | 0.48 |
| ITGA4     | Integrin, alpha 4 (antigen CD49D, alpha 4 subunit of VLA-4 receptor)                                           | 0.48 |
| ERBB2     | V-erb-b2 erythroblastic leukemia viral oncogene homolog 2, neuro/glioblastoma derived oncogene homolog (avian) | 0.47 |
| IL8       | Interleukin 8                                                                                                  | 0.45 |
| MMP9      | Matrix metalloproteinase 9 (gelatinase B, 92kDa gelatinase, 92kDa type IV collagenase)                         | 0.44 |
| S100A4    | S100 calcium binding protein A4                                                                                | 0.44 |
| ITGAV     | Integrin, alpha V (vitronectin receptor, alpha polypeptide, antigen CD51)                                      | 0.33 |
| TIMP3     | TIMP metalloproteinase inhibitor 3                                                                             | 0.21 |

**Supplementary Table 2.** The expression change of NDRG1 from KYSE30- Ctrl and KYSE30-NDRG1 cells in Epithelial Mesenchymal Transition PCR array (PAHS-090A).

| <b>Symbol</b> | <b>Description</b>                                                                     | <b>Fold change<br/>(NDRG1 vs Ctrl)</b> |
|---------------|----------------------------------------------------------------------------------------|----------------------------------------|
| MSN           | Moesin                                                                                 | 32.79                                  |
| WNT5A         | Wingless-type MMTV integration site family, member 5A                                  | 2.76                                   |
| CDH2          | Cadherin 2, type 1, N-cadherin (neuronal)                                              | 2.41                                   |
| VIM           | Vimentin                                                                               | 2.06                                   |
| RGS2          | Regulator of G-protein signaling 2, 24kDa                                              | 2.05                                   |
| PLEK2         | Pleckstrin 2                                                                           | 1.82                                   |
| PTP4A1        | Protein tyrosine phosphatase type IVA, member 1                                        | 1.54                                   |
| ITGA5         | Integrin, alpha 5 (fibronectin receptor, alpha polypeptide)                            | 1.49                                   |
| PPPDE2        | PPPDE peptidase domain containing 2                                                    | 1.48                                   |
| AHNAK         | AHNAK nucleoprotein                                                                    | 1.45                                   |
| TWIST1        | Twist homolog 1 (Drosophila)                                                           | 1.43                                   |
| BMP1          | Bone morphogenetic protein 1                                                           | 1.40                                   |
| TGFB1         | Transforming growth factor, beta 1                                                     | 1.40                                   |
| MMP2          | Matrix metalloproteinase 2 (gelatinase A, 72kDa gelatinase, 72kDa type IV collagenase) | 1.35                                   |
| ZEB1          | Zinc finger E-box binding homeobox 1                                                   | 1.35                                   |
| TFPI2         | Tissue factor pathway inhibitor 2                                                      | 1.30                                   |
| STEAP1        | Six transmembrane epithelial antigen of the prostate 1                                 | 1.28                                   |
| CAMK2N1       | Calcium/calmodulin-dependent protein kinase II inhibitor 1                             | 1.25                                   |
| WNT5B         | Wingless-type MMTV integration site family, member 5B                                  | 1.22                                   |
| TIMP1         | TIMP metalloproteinase inhibitor 1                                                     | 1.16                                   |
| COL1A2        | Collagen, type I, alpha 2                                                              | 1.13                                   |
| ACTB          | Actin, beta                                                                            | 1.12                                   |
| KRT14         | Keratin 14                                                                             | 1.10                                   |
| WNT11         | Wingless-type MMTV integration site family, member 11                                  | 1.08                                   |
| SIP1          | Survival of motor neuron protein interacting protein 1                                 | 1.05                                   |
| B2M           | Beta-2-microglobulin                                                                   | 1.02                                   |
| COL3A1        | Collagen, type III, alpha 1                                                            | 0.99                                   |
| MST1R         | Macrophage stimulating 1 receptor (c-met-related tyrosine kinase)                      | 0.99                                   |
| FOXC2         | Forkhead box C2 (MFH-1, mesenchyme forkhead                                            | 0.97                                   |

|          | 1)                                                                                            |      |
|----------|-----------------------------------------------------------------------------------------------|------|
| SNAI1    | Snail homolog 1 (Drosophila)                                                                  | 0.96 |
| KRT7     | Keratin 7                                                                                     | 0.95 |
| NODAL    | Nodal homolog (mouse)                                                                         | 0.92 |
| IL1RN    | Interleukin 1 receptor antagonist                                                             | 0.92 |
| FZD7     | Frizzled family receptor 7                                                                    | 0.90 |
| IGFBP4   | Insulin-like growth factor binding protein 4                                                  | 0.90 |
| SERPINE1 | Serpin peptidase inhibitor, clade E (nexin, plasminogen activator inhibitor type 1), member 1 | 0.88 |
| HPRT1    | Hypoxanthine phosphoribosyltransferase 1                                                      | 0.88 |
| PTK2     | PTK2 protein tyrosine kinase 2                                                                | 0.85 |
| SNAI2    | Snail homolog 2 (Drosophila)                                                                  | 0.82 |
| FN1      | Fibronectin 1                                                                                 | 0.82 |
| RAC1     | Ras-related C3 botulinum toxin substrate 1 (rho family, small GTP binding protein Rac1)       | 0.82 |
| TMEFF1   | Transmembrane protein with EGF-like and two follistatin-like domains 1                        | 0.79 |
| TMEM132A | Transmembrane protein 132A                                                                    | 0.78 |
| COL5A2   | Collagen, type V, alpha 2                                                                     | 0.74 |
| NOTCH1   | Notch 1                                                                                       | 0.73 |
| DSP      | Desmoplakin                                                                                   | 0.73 |
| JAG1     | Jagged 1                                                                                      | 0.73 |
| CTNNB1   | Catenin (cadherin-associated protein), beta 1, 88kDa                                          | 0.73 |
| BMP7     | Bone morphogenetic protein 7                                                                  | 0.72 |
| STAT3    | Signal transducer and activator of transcription 3 (acute-phase response factor)              | 0.72 |
| TGFB3    | Transforming growth factor, beta 3                                                            | 0.69 |
| ESR1     | Estrogen receptor 1                                                                           | 0.67 |
| ERBB3    | V-erb-b2 erythroblastic leukemia viral oncogene homolog 3 (avian)                             | 0.67 |
| F11R     | F11 receptor                                                                                  | 0.66 |
| GSK3B    | Glycogen synthase kinase 3 beta                                                               | 0.65 |
| TSPAN13  | Tetraspanin 13                                                                                | 0.65 |
| GNG11    | Guanine nucleotide binding protein (G protein), gamma 11                                      | 0.65 |
| DSC2     | Desmocollin 2                                                                                 | 0.64 |
| ZEB2     | Zinc finger E-box binding homeobox 2                                                          | 0.63 |
| NUDT13   | Nudix (nucleoside diphosphate linked moiety X)-type motif 13                                  | 0.62 |
| SPARC    | Secreted protein, acidic, cysteine-rich (osteonectin)                                         | 0.62 |
| TCF3     | Transcription factor 3 (E2A immunoglobulin                                                    | 0.61 |

|        | enhancer binding factors E12/E47)                                                            |      |
|--------|----------------------------------------------------------------------------------------------|------|
| RPL13A | Ribosomal protein L13a                                                                       | 0.60 |
| CAV2   | Caveolin 2                                                                                   | 0.60 |
| ITGB1  | Integrin, beta 1 (fibronectin receptor, beta polypeptide, antigen CD29 includes MDF2, MSK12) | 0.59 |
| EGFR   | Epidermal growth factor receptor                                                             | 0.59 |
| CDH1   | Cadherin 1, type 1, E-cadherin (epithelial)                                                  | 0.57 |
| ILK    | Integrin-linked kinase                                                                       | 0.54 |
| GAPDH  | Glyceraldehyde-3-phosphate dehydrogenase                                                     | 0.54 |
| GSC    | Goosecoidhomeobox                                                                            | 0.51 |
| FGFBP1 | Fibroblast growth factor binding protein 1                                                   | 0.51 |
| OCLN   | Occludin                                                                                     | 0.50 |
| CALD1  | Caldesmon 1                                                                                  | 0.49 |
| KRT19  | Keratin 19                                                                                   | 0.49 |
| SPP1   | Secreted phosphoprotein 1                                                                    | 0.47 |
| PDGFRB | Platelet-derived growth factor receptor, beta polypeptide                                    | 0.44 |
| SMAD2  | SMAD family member 2                                                                         | 0.43 |
| MMP9   | Matrix metalloproteinase 9 (gelatinase B, 92kDa gelatinase, 92kDa type IV collagenase)       | 0.41 |
| MAP1B  | Microtubule-associated protein 1B                                                            | 0.39 |
| SOX10  | SRY (sex determining region Y)-box 10                                                        | 0.39 |
| SNAI3  | Snail homolog 3 (Drosophila)                                                                 | 0.35 |
| TCF4   | Transcription factor 4                                                                       | 0.34 |
| ITGAV  | Integrin, alpha V (vitronectin receptor, alpha polypeptide, antigen CD51)                    | 0.34 |
| MITF   | Microphthalmia-associated transcription factor                                               | 0.33 |
| VPS13A | Vacuolar protein sorting 13 homolog A (S. cerevisiae)                                        | 0.31 |
| TGFB2  | Transforming growth factor, beta 2                                                           | 0.31 |
| MMP3   | Matrix metalloproteinase 3 (stromelysin 1, progelatinase)                                    | 0.27 |
| AKT1   | V-akt murine thymoma viral oncogene homolog 1                                                | 0.19 |
| VCAN   | Versican                                                                                     | 0.13 |

**Supplementary Table 3.** The expression change of NDRG1 from KYSE30- Ctrl and KYSE30-NDRG1 cells in Wnt Signaling Pathway PCR array (PAHS-043A).

| <b>Symbol</b> | <b>Description</b>                                                  | <b>Fold change<br/>(NDRG1 vs Ctrl)</b> |
|---------------|---------------------------------------------------------------------|----------------------------------------|
| FZD8          | Frizzled family receptor 8                                          | 2.20                                   |
| MYC           | V-mycmyelocytomatosis viral oncogene homolog<br>(avian)             | 1.56                                   |
| JUN           | Jun proto-oncogene                                                  | 1.43                                   |
| FOSL1         | FOS-like antigen 1                                                  | 1.37                                   |
| WIF1          | WNT inhibitory factor 1                                             | 1.35                                   |
| ACTB          | Actin, beta                                                         | 1.34                                   |
| FRZB          | Frizzled-related protein                                            | 1.26                                   |
| AXIN1         | Axin 1                                                              | 1.25                                   |
| DVL1          | Dishevelled, dsh homolog 1 (Drosophila)                             | 1.23                                   |
| WNT3          | Wingless-type MMTV integration site family, member 3                | 1.20                                   |
| GSK3B         | Glycogen synthase kinase 3 beta                                     | 1.17                                   |
| WNT9A         | Wingless-type MMTV integration site family, member<br>9A            | 1.14                                   |
| TCF7          | Transcription factor 7 (T-cell specific, HMG-box)                   | 1.13                                   |
| CTBP1         | C-terminal binding protein 1                                        | 1.10                                   |
| GAPDH         | Glyceraldehyde-3-phosphate dehydrogenase                            | 1.09                                   |
| GSK3A         | Glycogen synthase kinase 3 alpha                                    | 1.09                                   |
| PORCN         | Porcupine homolog (Drosophila)                                      | 1.08                                   |
| FZD4          | Frizzled family receptor 4                                          | 1.05                                   |
| CSNK2A1       | Casein kinase 2, alpha 1 polypeptide                                | 1.05                                   |
| LEF1          | Lymphoid enhancer-binding factor 1                                  | 1.05                                   |
| FBXW11        | F-box and WD repeat domain containing 11                            | 1.04                                   |
| CCND3         | Cyclin D3                                                           | 1.04                                   |
| WNT7A         | Wingless-type MMTV integration site family, member<br>7A            | 1.03                                   |
| CSNK1A1       | Casein kinase 1, alpha 1                                            | 1.01                                   |
| WNT2B         | Wingless-type MMTV integration site family, member<br>2B            | 1.01                                   |
| B2M           | Beta-2-microglobulin                                                | 1.00                                   |
| TLE1          | Transducin-like enhancer of split 1 (E(sp1) homolog,<br>Drosophila) | 0.99                                   |
| PYGO1         | Pygopus homolog 1 (Drosophila)                                      | 0.98                                   |
| WNT1          | Wingless-type MMTV integration site family, member 1                | 0.98                                   |
| T             | T, brachyury homolog (mouse)                                        | 0.98                                   |
| CSNK1D        | Casein kinase 1, delta                                              | 0.98                                   |
| NLK           | Nemo-like kinase                                                    | 0.98                                   |
| DVL2          | Dishevelled, dsh homolog 2 (Drosophila)                             | 0.98                                   |
| WNT7B         | Wingless-type MMTV integration site family, member                  | 0.97                                   |



|          | 7B                                                                        |      |
|----------|---------------------------------------------------------------------------|------|
| BTRC     | Beta-transducin repeat containing                                         | 0.94 |
| DKK1     | Dickkopf homolog 1 ( <i>Xenopus laevis</i> )                              | 0.94 |
| FBXW2    | F-box and WD repeat domain containing 2                                   | 0.94 |
| CCND1    | Cyclin D1                                                                 | 0.93 |
| SLC9A3R1 | Solute carrier family 9 (sodium/hydrogen exchanger), member 3 regulator 1 | 0.93 |
| FZD6     | Frizzled family receptor 6                                                | 0.93 |
| SENP2    | SUMO1/sentrin/SMT3 specific peptidase 2                                   | 0.93 |
| WNT11    | Wingless-type MMTV integration site family, member 11                     | 0.92 |
| PPP2CA   | Protein phosphatase 2, catalytic subunit, alpha isozyme                   | 0.91 |
| LRP5     | Low density lipoprotein receptor-related protein 5                        | 0.90 |
| CTNNB1   | Catenin (cadherin-associated protein), beta 1, 88kDa                      | 0.88 |
| NKD1     | Naked cuticle homolog 1 ( <i>Drosophila</i> )                             | 0.88 |
| PPP2R1A  | Protein phosphatase 2, regulatory subunit A, alpha                        | 0.86 |
| WNT3A    | Wingless-type MMTV integration site family, member 3A                     | 0.86 |
| FBXW4    | F-box and WD repeat domain containing 4                                   | 0.86 |
| FZD7     | Frizzled family receptor 7                                                | 0.85 |
| LRP6     | Low density lipoprotein receptor-related protein 6                        | 0.85 |
| WNT2     | Wingless-type MMTV integration site family member 2                       | 0.84 |
| WNT5B    | Wingless-type MMTV integration site family, member 5B                     | 0.83 |
| RPL13A   | Ribosomal protein L13a                                                    | 0.83 |
| WNT10A   | Wingless-type MMTV integration site family, member 10A                    | 0.83 |
| SFRP4    | Secreted frizzled-related protein 4                                       | 0.82 |
| FZD2     | Frizzled family receptor 2                                                | 0.81 |
| AES      | Amino-terminal enhancer of split                                          | 0.80 |
| PITX2    | Paired-like homeodomain 2                                                 | 0.80 |
| CTBP2    | C-terminal binding protein 2                                              | 0.79 |
| CSNK1G1  | Casein kinase 1, gamma 1                                                  | 0.79 |
| WNT16    | Wingless-type MMTV integration site family, member 16                     | 0.77 |
| FZD3     | Frizzled family receptor 3                                                | 0.77 |
| DAAM1    | Dishevelled associated activator of morphogenesis 1                       | 0.77 |
| BCL9     | B-cell CLL/lymphoma 9                                                     | 0.76 |
| SOX17    | SRY (sex determining region Y)-box 17                                     | 0.75 |
| HPRT1    | Hypoxanthine phosphoribosyltransferase 1                                  | 0.75 |
| EP300    | E1A binding protein p300                                                  | 0.75 |
| SFRP1    | Secreted frizzled-related protein 1                                       | 0.75 |
| KREMEN1  | Kringle containing transmembrane protein 1                                | 0.74 |

|          |                                                                  |      |
|----------|------------------------------------------------------------------|------|
| WNT8A    | Wingless-type MMTV integration site family, member 8A            | 0.71 |
| APC      | Adenomatous polyposis coli                                       | 0.70 |
| WNT6     | Wingless-type MMTV integration site family, member 6             | 0.69 |
| TCF7L1   | Transcription factor 7-like 1 (T-cell specific, HMG-box)         | 0.67 |
| CXXC4    | CXXC finger protein 4                                            | 0.67 |
| CTNNBIP1 | Catenin, beta interacting protein 1                              | 0.66 |
| WISP1    | WNT1 inducible signaling pathway protein 1                       | 0.65 |
| FZD1     | Frizzled family receptor 1                                       | 0.65 |
| DIXDC1   | DIX domain containing 1                                          | 0.64 |
| FZD5     | Frizzled family receptor 5                                       | 0.64 |
| RHOU     | Ras homolog gene family, member U                                | 0.64 |
| FRAT1    | Frequently rearranged in advanced T-cell lymphomas               | 0.59 |
| TLE2     | Transducin-like enhancer of split 2 (E(sp1) homolog, Drosophila) | 0.50 |
| FOXN1    | Forkhead box N1                                                  | 0.49 |
| WNT4     | Wingless-type MMTV integration site family, member 4             | 0.49 |
| FSHB     | Follicle stimulating hormone, beta polypeptide                   | 0.45 |
| FGF4     | Fibroblast growth factor 4                                       | 0.42 |
| WNT5A    | Wingless-type MMTV integration site family, member 5A            | 0.18 |
| CCND2    | Cyclin D2                                                        | 0.06 |

**Supplementary Table 4.** Description of primers selected for validation by Real-Time RT-PCR

| <b>Gene symbol</b> | <b>Sequence Forward (5' &gt; 3')</b> | <b>Sequence Reverse (5' &gt; 3')</b> |
|--------------------|--------------------------------------|--------------------------------------|
| ACTB               | AGCCTCGCCTTTGCCGA                    | CTGGTGCCTGGGGCG                      |
| MMP1               | TGTCAGGGGAGATCATCGGG                 | GGCCGAGTTCATGAGCTGCAAC               |
| MTSS1              | ATTGGGCCCGGCATGTTCCC                 | TCGCTTCTCTTTGCGGCGCT                 |
| TLE2               | CTGCTTGGCGCGTTCTAC                   | CATAAGCAGGCGGAGATTGT                 |
| CDH2               | CCATCAAGCCTGTGGGAATC                 | GCAGATCGGACCGGATACTG                 |
| NDRG1              | GTGGTTGGGGACAGCTCGC                  | CAGCAGCACCCGAGTTGGGG                 |
| SNAI1              | TGCGCTACTGCTCGGCGAAT                 | AGGGCTGCTGGAAGGTAAACT                |
| TWIST1             | CACGAGCGGCTCAGCTACGC                 | ACAATGACATCTAGGTCTCCGG               |
| ZEB1               | AGTGGTCATGATGAAAATGGAA               | AGGTGTAAGTGCACAGGGAGC                |
| FOXC2              | GCCTAAGGACCTGGTGAAGC                 | TTGACGAAGCACTCGTTGAG                 |
| ACTB               | AGCCTCGCCTTTGCCGA                    | CTGGTGCCTGGGGCG                      |
| MMP1               | TGTCAGGGGAGATCATCGGGAC               | GGCCGAGTTCATGAGCTGCAA                |
| MTSS1              | ATTGGGCCCGGCATGTTCCC                 | TCGCTTCTCTTTGCGGCGCT                 |
